# Supplementary material for: n-3 Fatty Acids, Ventricular Arrhythmia–Related Events, and Fatal Myocardial Infarction in Postmyocardial Infarction Patients With Diabetes
Source: Oxford University Press journal article supplement (doi:10.2337/dc11-0896), 2011-11-14

## SUPPLEMENTARY DATA

**Supplementary Figure 1.** Flow chart of the Alpha Omega Trial. Patients could have more than one reason for discontinuation of margarine use, so numbers add up to more than the total.

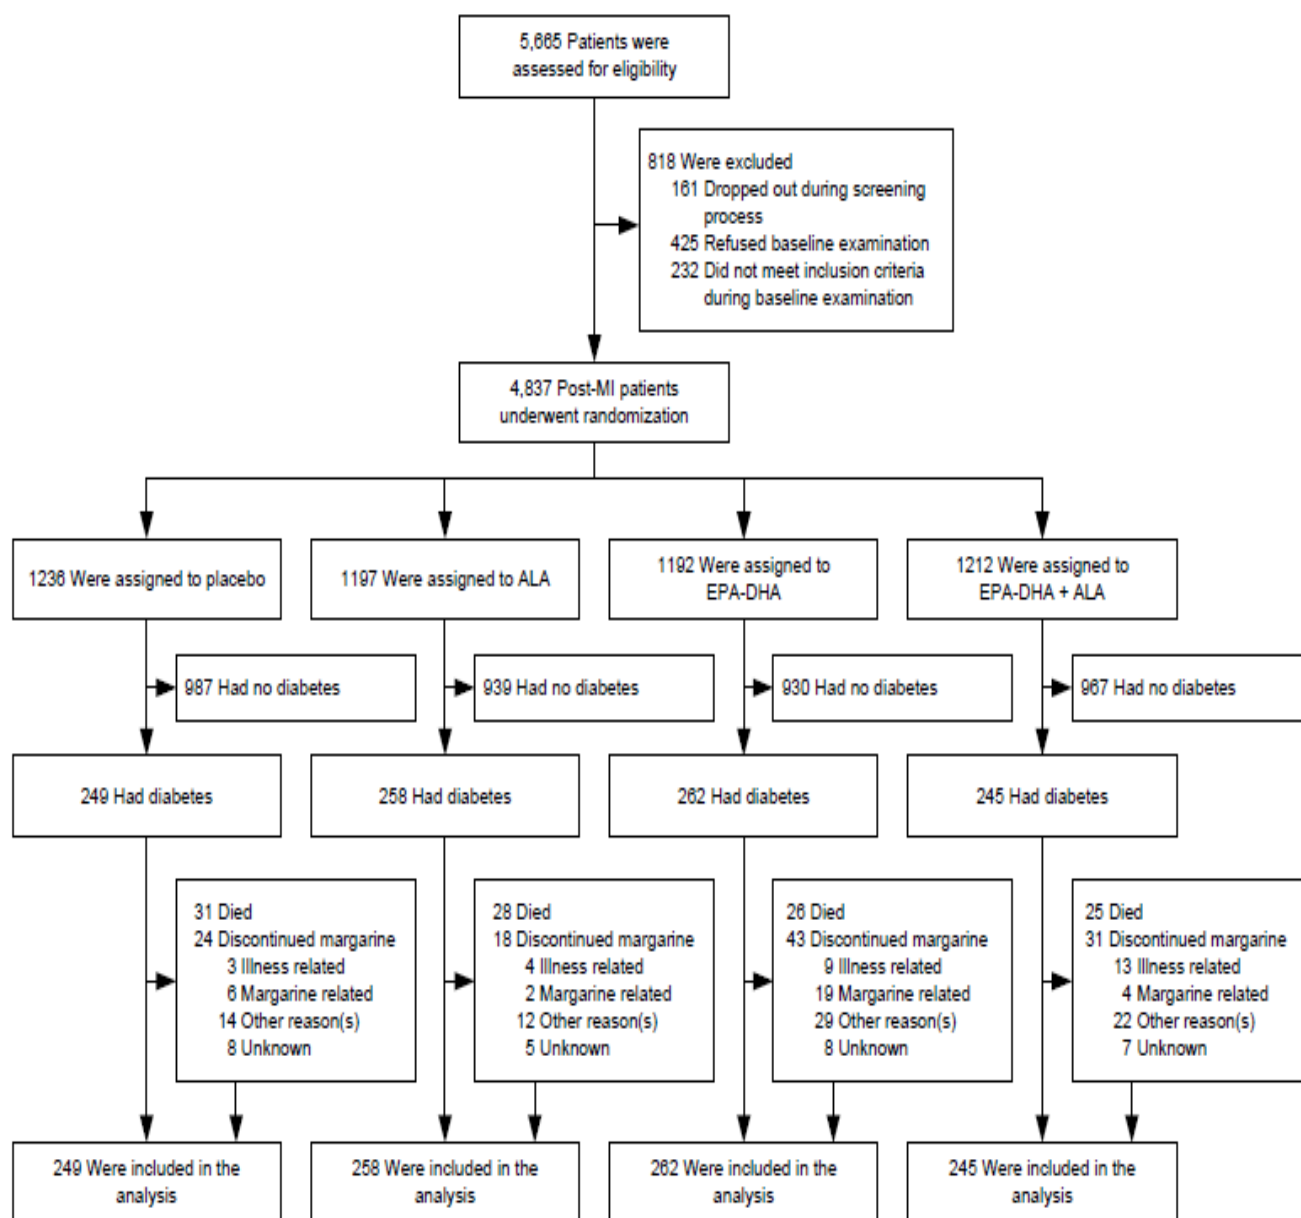

## SUPPLEMENTARY DATA

**Supplementary Figure 2.** ALA, EPA and DHA concentrations in plasma cholesteryl esters at baseline, 20 and 40 months in random samples of patients with a myocardial infarction and diabetes, according to n-3 fatty-acid supplementation.

Geometric mean values (expressed as mass percentage) with error bars indicating 95% confidence intervals on logarithmic scales. \* $P < 0.001$  for group difference at that time point, obtained by ANOVA.

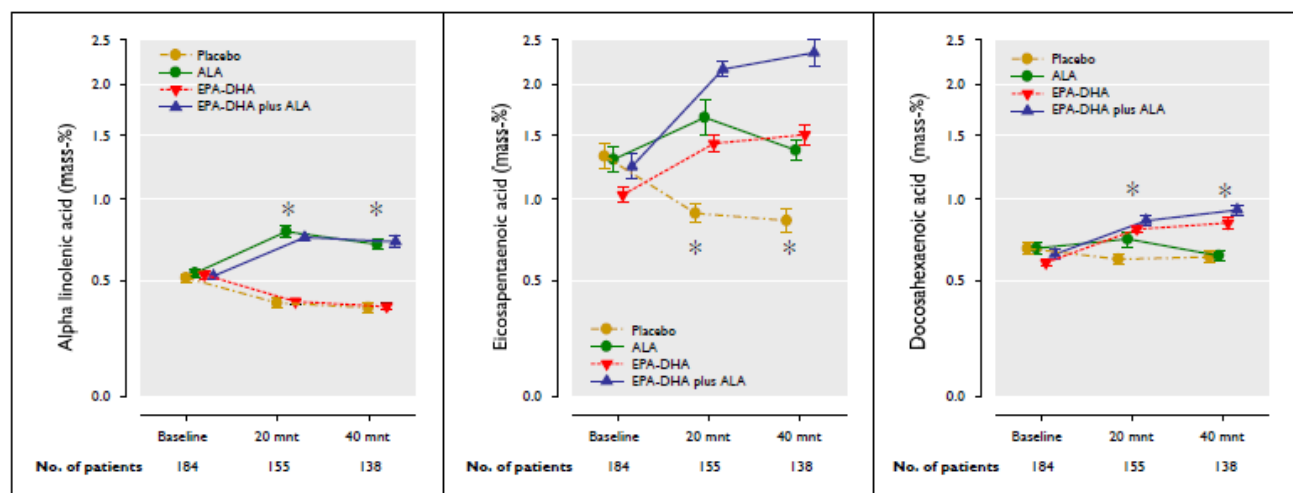

Supplement: dc110896supplementarydata.pdf [file dc110896supplementarydata.pdf]
